# Supplementary material
Source: PubMed Central journal article supplement (PMC3482266)
Supplement: NIHMS397094-supplement-1.pdf [file NIHMS397094-supplement-1.pdf]

## **Supplementary Information**

### **Crystal structure of the multidrug transporter P-glycoprotein from *C. elegans***

Mi Sun Jin<sup>1</sup>, Michael L. Oldham<sup>2</sup>, Qiuju Zhang<sup>2</sup> & Jue Chen<sup>1,2</sup>

<sup>1</sup>Department of Biological Sciences, Purdue University and <sup>2</sup>Howard Hughes Medical Institute West  
Lafayette, Indiana 47907, USA.

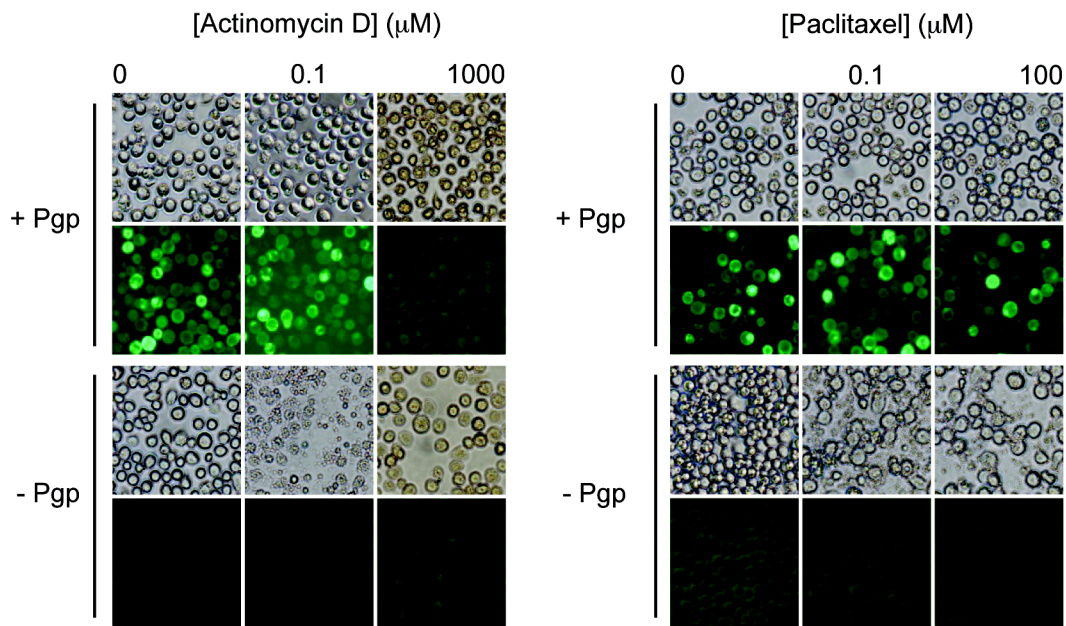

**Supplementary Figure 1a. Expression of *C. elegans* P-gp confers cellular resistance to cytotoxic drugs.** Sf9 cells expressing P-gp (+Pgp) were cultured in the presence of anticancer drugs actinomycin D (12 hours) or paclitaxel (48 hours) and imaged using light and fluorescence microscopy. Protection from drug-induced cytotoxicity is correlated with the appearance of P-gp in the membrane of infected cells as monitored by green fluorescence protein (GFP) fused on the C-terminus of P-gp. Images of uninfected cells (-Pgp) were also shown as controls.

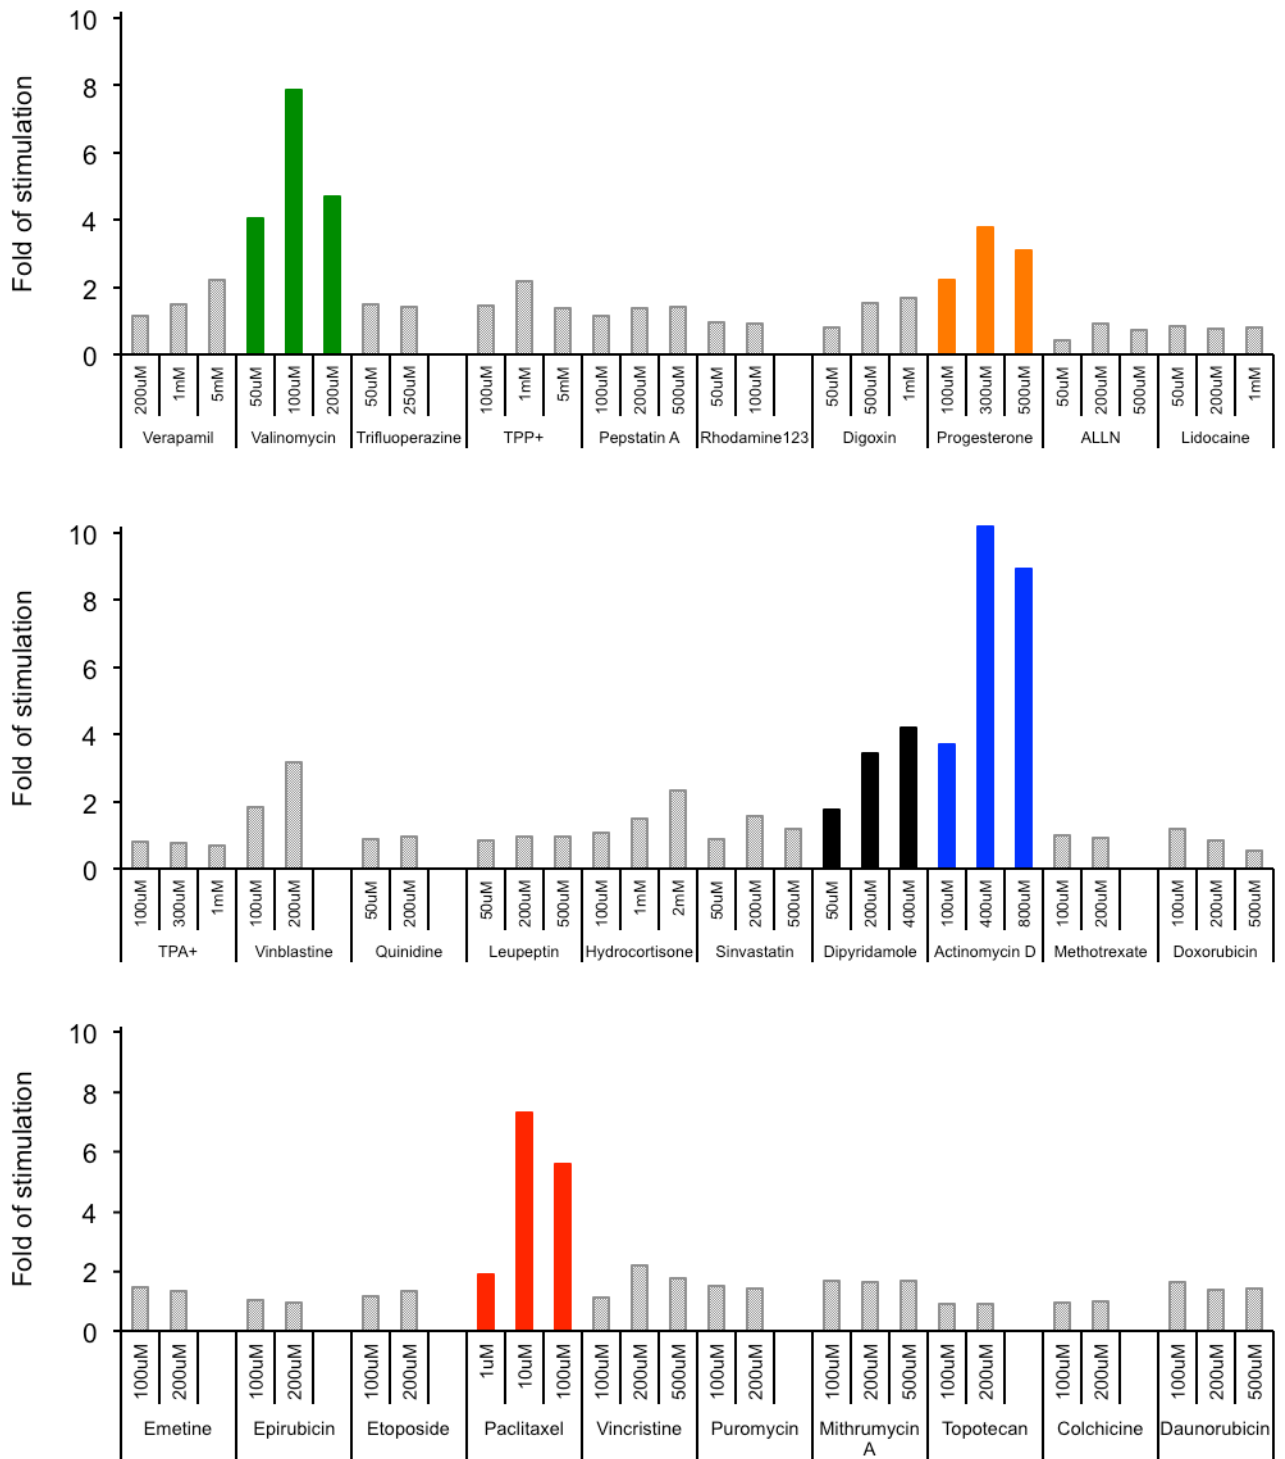

**Supplementary Figure 1b. Stimulation of the ATPase activity by different compounds as indicated. The best five substrates are colored as in Fig. 1 in the main text.**

**a**

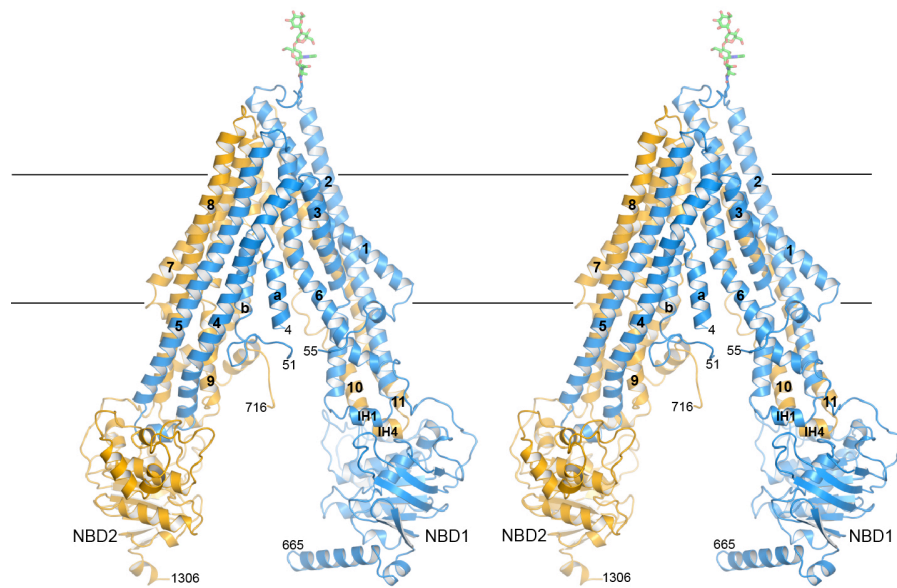

**b**

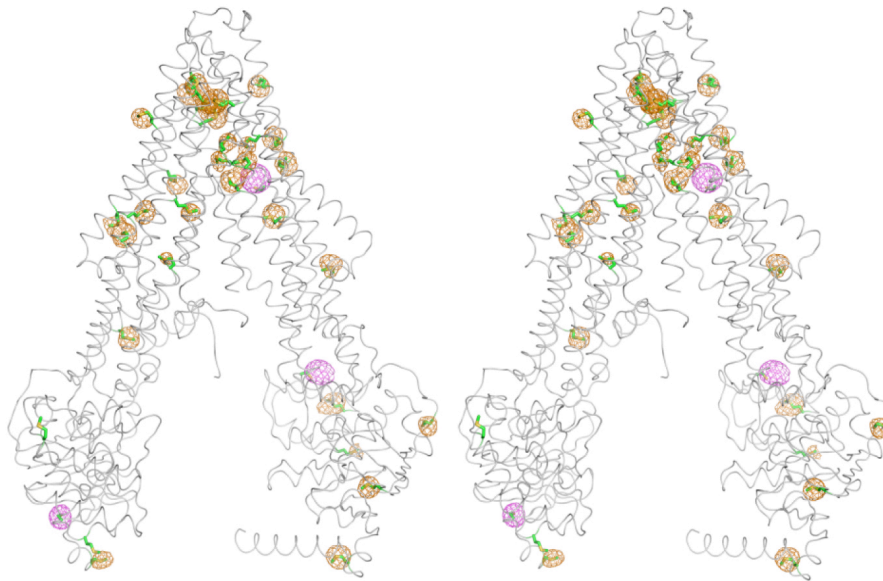

**Supplementary Figure 2. The structure of *C. elegans* P-gp.** **a**, Stereo view of a ribbon presentation. N125 and the attached oligosaccharide are shown in stick model. The N- and C-terminal halves of P-gp are shown in blue and gold, respectively. **b**, Stereo view of the anomalous difference Fourier electron density maps. The backbone of P-gp is shown in grey ribbon, methionine and cysteine residues are shown in green stick models. The orange and magenta meshes represent anomalous difference Fourier maps (contoured at  $4\sigma$ ) calculated from data collected at selenium and mercury absorption edges, respectively.

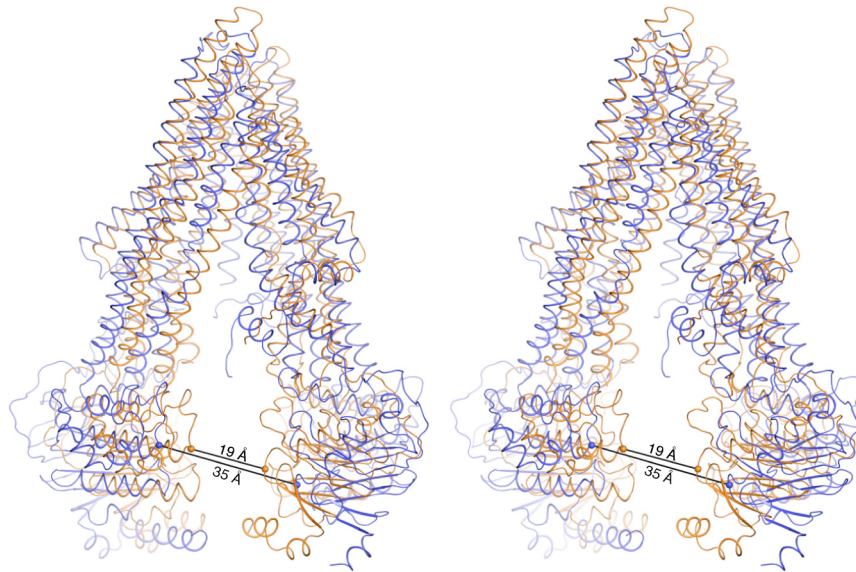

**Supplementary Figure 3. Superposition of the mouse P-gp<sup>1</sup> (orange, PDB code: 3G5U) and *C. elegans* P-gp (blue) structures.** The distances between two serine residues, one in the ABC signature motif and the other in the Walker A motif, are labeled for both structures.

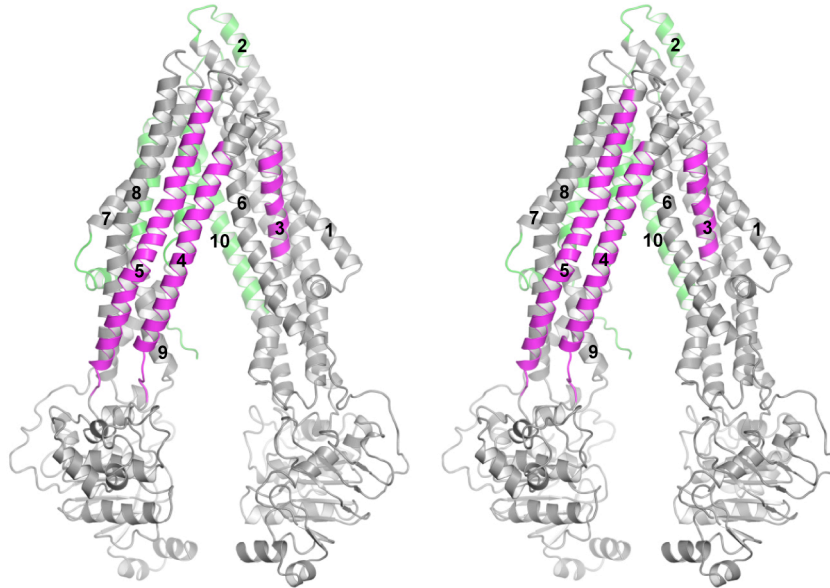

**Supplementary Figure 4. Stereo view of the mouse P-gp structure<sup>1</sup> (PDB code: 3G5U).**

Color codes: magenta, regions containing register errors; green, regions where the structure is not directly comparable with that of the *C. elegans* P-gp; grey, regions where the register assignment is consistent with that of the *C. elegans* P-gp. A region of TM3 (residues 184-200 in mouse P-gp) is shifted by one amino acid, the entire TM4 helix (residues 217-251) is shifted by four amino acids, and TM5 is shifted by three amino acids, although only residues 266-281 are directly comparable between *C. elegans* and mouse P-gp. Furthermore, residues flanking IH2 (251-255 and 265-268) were built incorrectly as loops rather than  $\alpha$ -helices in the mouse model.

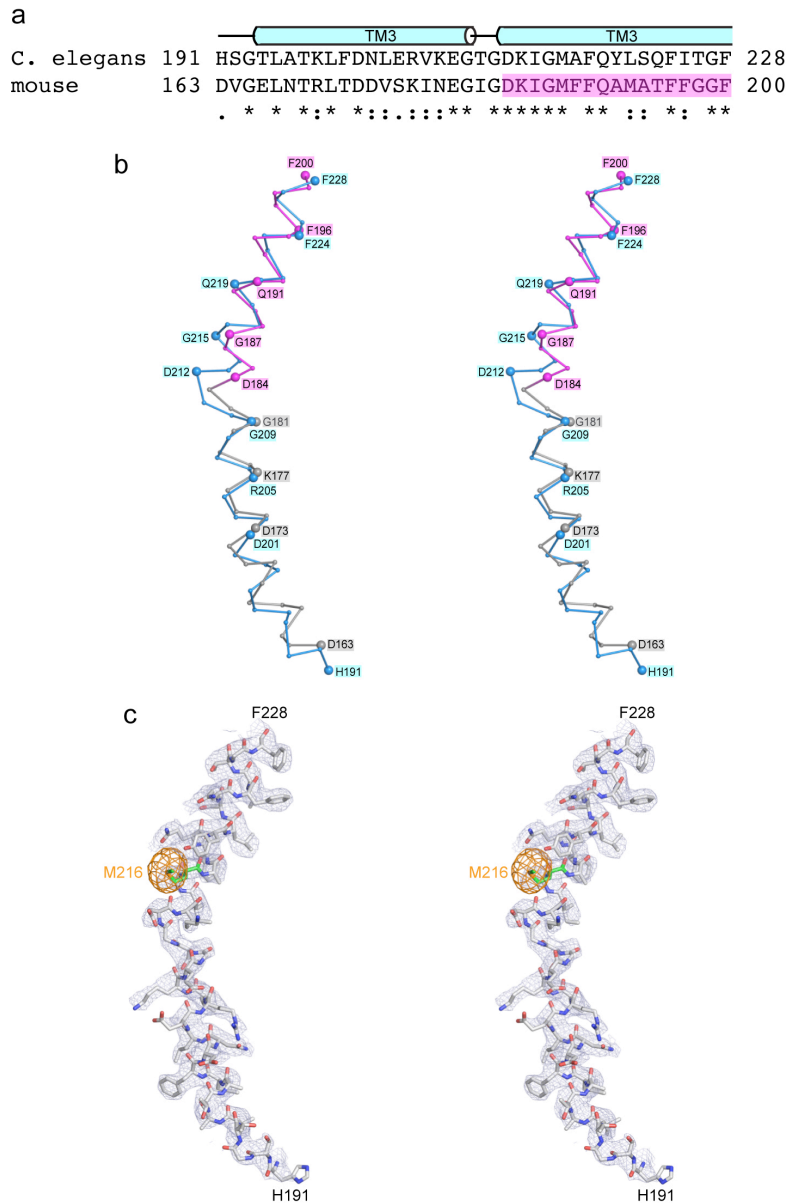

**Supplementary Figure 5. Structural comparison of helix TM3.** **a**, sequence alignment. The region in mouse P-gp containing a one-amino acid register shift is highlighted in magenta. **b**, structural alignment. Color codes: blue, *C. elegans* P-gp; magenta, regions in mouse P-gp containing register errors; grey, regions in mouse P-gp where register assignment agrees with that of the *C. elegans* P-gp. The C $\alpha$  atoms of representative residues aligned based on sequence are shown as larger spheres and labeled: blue, *C. elegans* P-gp; grey/magenta: mouse P-gp. **c**, The electron density maps of the *C. elegans* P-gp in this region: grey, 2F $_o$ -F $_c$  map (contoured at 1 $\sigma$ ); orange: Seleno anomalous difference Fourier map (contoured at 4 $\sigma$ ). The structure of *C. elegans* P-gp is shown in stick model.

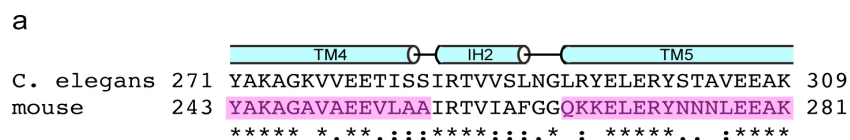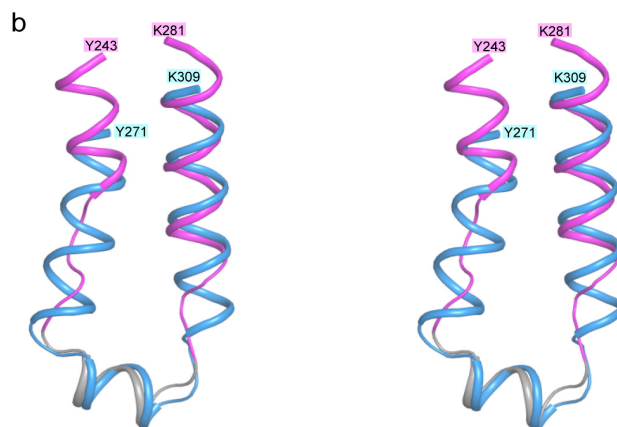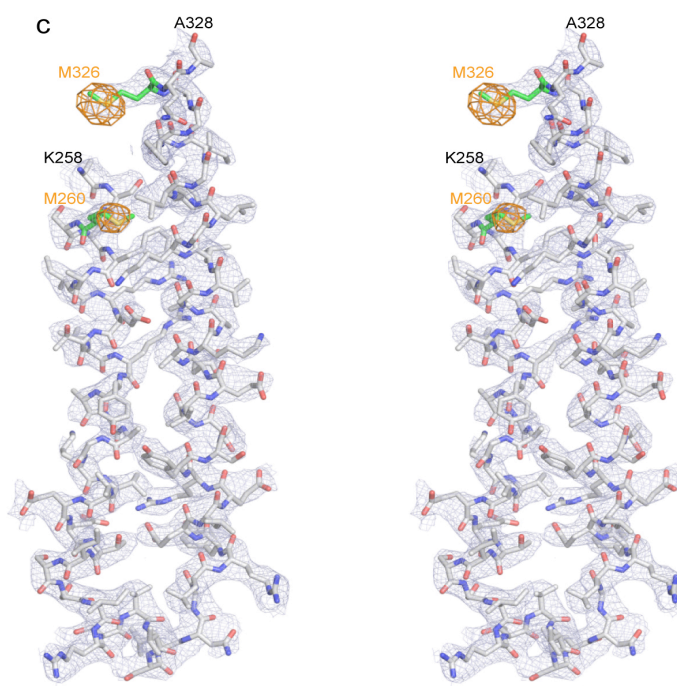

**Supplementary Figure 6. Structural comparison of the TM4-TM5 region.** For simplicity, only parts of helices TM4 and TM5 are shown. **a**, sequence alignment. **b**, structural alignment. **c**, The electron density maps of the *C. elegans* P-gp in this region: grey,  $2F_o - F_c$  map (contoured at  $1\sigma$ ); orange: Seleno anomalous difference Fourier map (contoured at  $4\sigma$ ). The structure of *C. elegans* P-gp is shown in stick model. Same color code as Supplementary Figure 5.



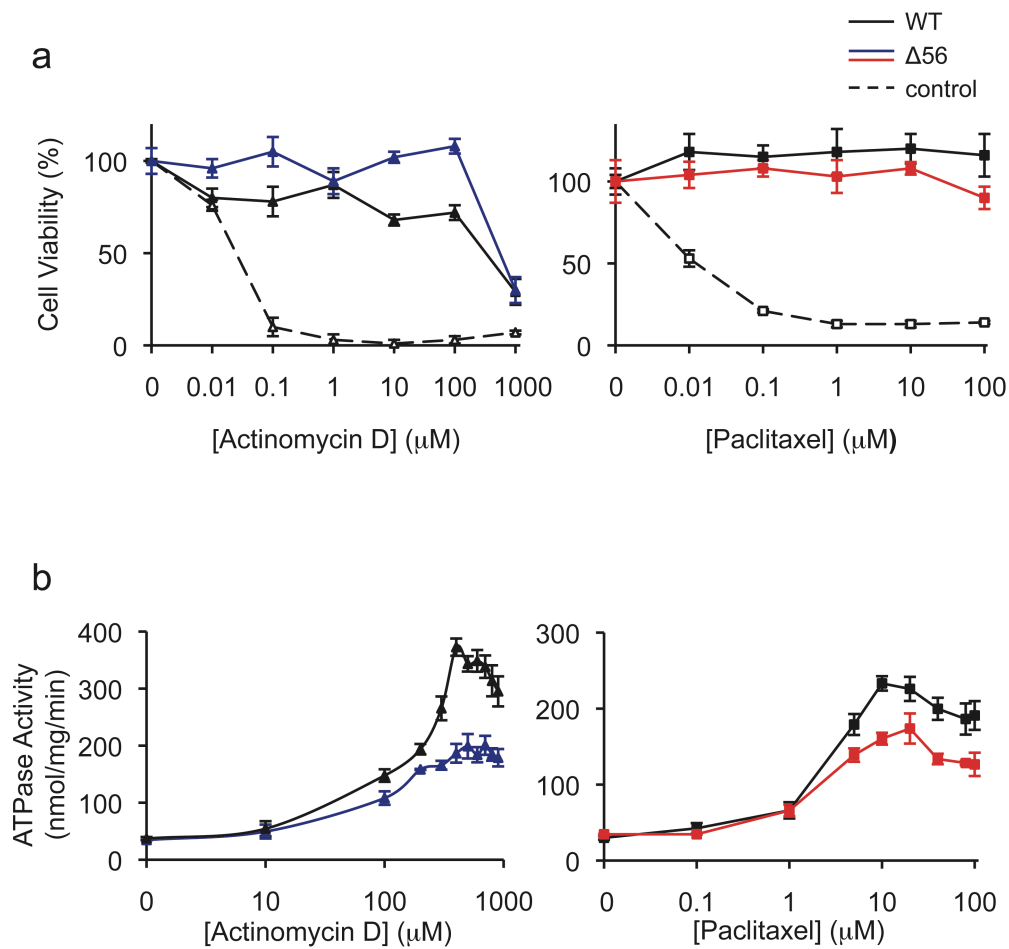

**Supplementary Figure 7. Cytotoxic (a) and ATPase activity assays (b) of a truncation mutant devoid of the N-terminal 56 residues ( $\Delta 56$ ).** **a**, The N-terminal truncation mutant  $\Delta 56$  confers cellular resistance to actinomycin D (blue) and paclitaxel (red) similarly to the full-length protein (WT). **b**, The truncation mutant has a reduced maximum level of drug-stimulated ATPase activity in detergent, however, the drug concentration dependence is unaltered for the truncation mutant.

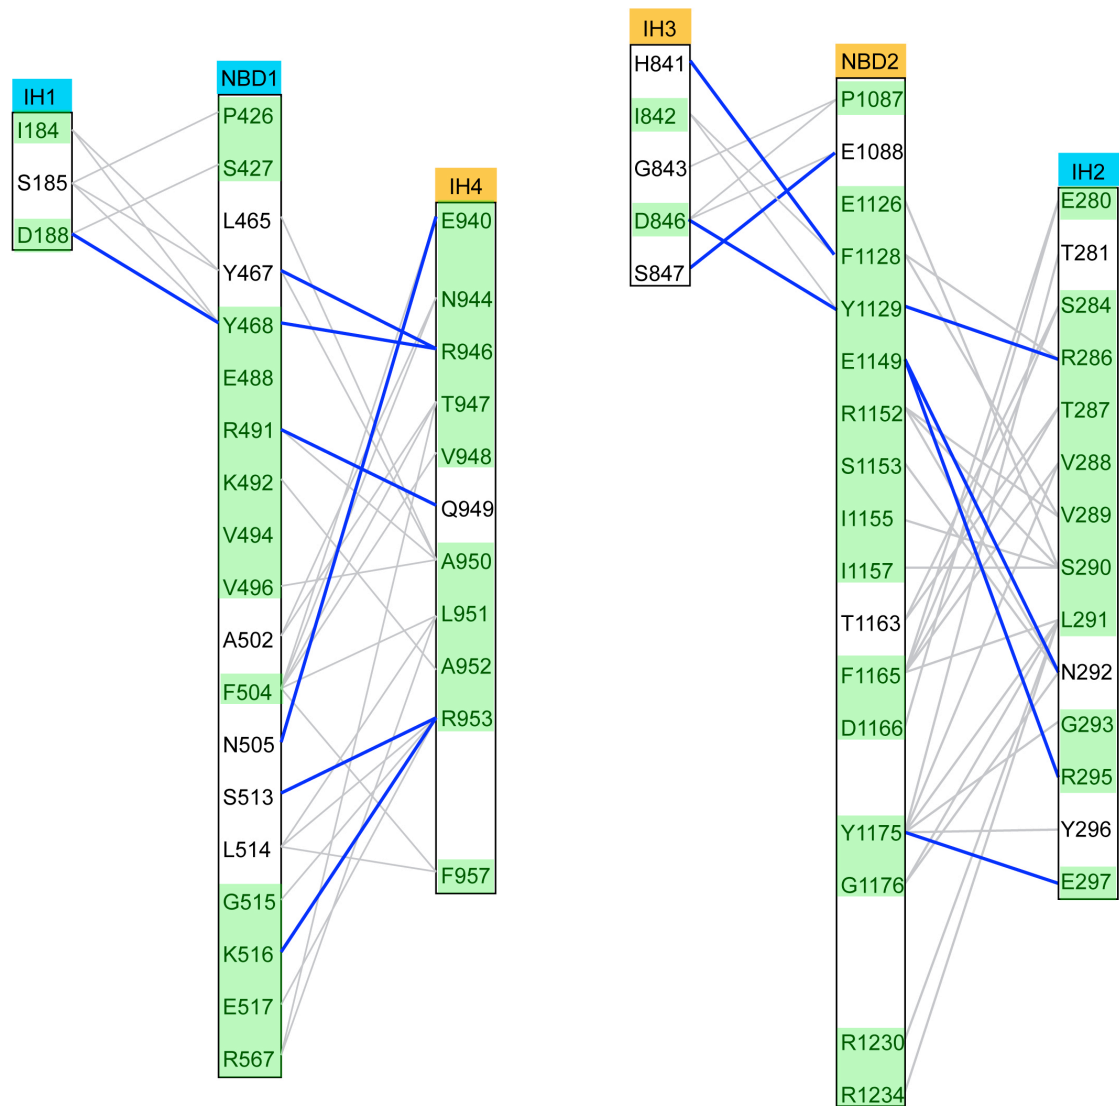

**Supplementary Figure 8. Schematic diagram of the interactions between the TMDs and NBDs.** Salt bridges and hydrogen bonds are indicated by blue lines; van der Waals interactions are shown as grey lines. Residues conserved in human P-gp are highlighted in green.

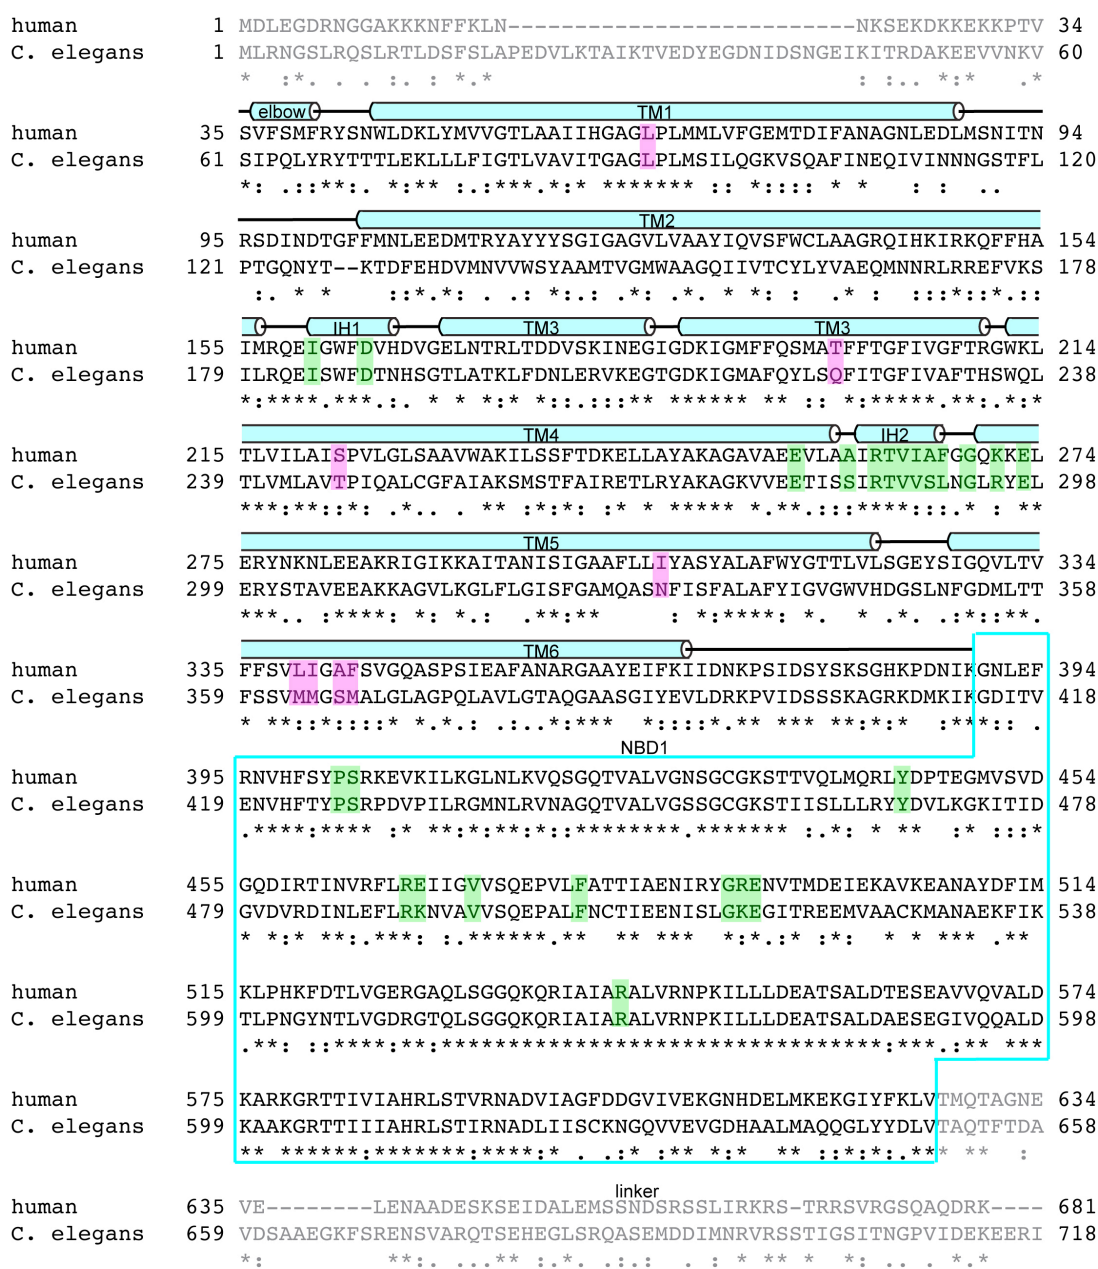

**Supplementary Figure 9. Sequence alignment between human and *C. elegans* P-gp.** Secondary structure is indicated for both the *C. elegans* P-gp structure and the corresponding human P-gp model. Conserved residues at the NBD/TMD interfaces are highlighted in green. Drug-interacting residues labeled in Figure 4f are highlighted in magenta. Residues that are not modeled in the human P-gp structure due to low sequence conservation are shown in grey. Figure is continued on the next page.

Supplementary Figure 9 (continued)

|            |      |                                                                                      |       |      |                                       |      |
|------------|------|--------------------------------------------------------------------------------------|-------|------|---------------------------------------|------|
| human      | 681  | ----LS-TKEALDES-IPPVSV                                                               | elbow | TM7  | FRIMKLNLTWPYFVVGVFCAIINGGLQPAFAIIFSKI | 735  |
| C. elegans | 719  | GKDALSRLKQLEENNAQKTNLFEILYHARPHALSFIGMSTATIGGFYIPTYSVFFTSF                           |       |      |                                       | 778  |
|            |      | ** *: *:*. . . . . *: . . . . . *: * * * : * : : : : * : : . . . . .                 |       |      |                                       |      |
| human      | 736  | IGVFTRIDDPETKRQNSNLFSLFLALGIISFITFFLQGFTEFGKAGEILTKRLRYMVFRS                         |       | TM8  |                                       | 795  |
| C. elegans | 779  | MNVFA--GNPADFLSQGHFWALMFLVLAQAQGICSFMTFFMGIASESLTRDLRNKLFNRN                         |       |      |                                       | 836  |
|            |      | :*: * : * . . . . . :*: * . * ** * : * * * : * * : * : *                             |       |      |                                       |      |
| human      | 796  | MLRQDVSWFDDPKNTTGALTTRLANDAAQVKGAIGSRLAVITQNIANLGTGIIISFIYGW                         | IH3   | TM9  | TM9                                   | 855  |
| C. elegans | 837  | VLSQHIGFFDSPQNASKISTRLATDVPNLRTAIDFRFSTVITLVSMVAGIGLAFFYGW                           |       |      |                                       | 896  |
|            |      | :* * . . . . :*: * : : * : * : * : * : * : * : * : * : * : * : * : * : * : * : *     |       |      |                                       |      |
| human      | 856  | QLTLLLLAIVPIIAIAGVEMKMLSGQALKDKKELEGAGKIATEAENFRTVVSLTQEOK                           | TM10  | TM10 | IH4                                   | 915  |
| C. elegans | 897  | QMALLIITAILPIVAFGQYLRGRRFTGKNVKSASEFADSGAIAIEAENVRTVQALAREDT                         |       |      |                                       | 956  |
|            |      | *: * : * : * : * : * : * . . . . . : * : * : * . * : * : * * * * * * * * : * : * : * |       |      |                                       |      |
| human      | 916  | FEHMYAQLQVQVYRNSLRKAHIFGITFSFTQAMMYFSYAGCFRFGAYLVAHK--LMSFD                          | TM11  |      |                                       | 973  |
| C. elegans | 957  | FYENFCEKLDIPHKEAIEAFIQGLSYGCASSVLYLLNTCAYRMGLALIIDPPTMQPMR                           |       |      |                                       | 1016 |
|            |      | * . . . . :* : * : * : * : * : * : * : * : * : * : * : * : * : * : * . *             |       |      |                                       |      |
| human      | 974  | VLVFSAVVFGAMAVGQVSSFAPDYAKAKISAHIMIIEKTPLIDSYSTEGLMPNTLEG                            | TM12  | TM12 |                                       | 1033 |
| C. elegans | 1017 | VLRVMYAITISTSTLGFATSYFPEYAKATFAGGIIFGMLRKISKIDSLSLAGEK--KKLYG                        |       |      |                                       | 1075 |
|            |      | ** * : * : : : * : * : * : * : * : * : * : * : * : * : * : * * * * * * * : * * *     |       |      |                                       |      |
|            |      |                                                                                      | NBD2  |      |                                       |      |
| human      | 1034 | NVTFGEVVFNYTPTRDIPVLQGLSLEVKKGQTLALVGSSGCGKSTVVQLLERFYDPLAGK                         |       |      |                                       | 1093 |
| C. elegans | 1076 | KVIFKNVRFAYPERPEIEILKGLSFSVEPGQTLALVGPSGCGKSTVVALLERFYDTLGGE                         |       |      |                                       | 1135 |
|            |      | :* * : * * * * * * : * : * : * : * : * * * * * * * * * * * * * * * * * : * :         |       |      |                                       |      |
| human      | 1094 | VLLDGKEIKRLNVQWLRALHGLIVSQEPIFLDCSIAENIAYGDNRSRVVSQEEIVRAAKEAN                       |       |      |                                       | 1153 |
| C. elegans | 1136 | IFIDGSEIKTLNPEHTRSQIAIVSQEPTLFLDCSIAENIYGLDPSSVTMAQVEEAARLAN                         |       |      |                                       | 1195 |
|            |      | :*: * * * * * : * : : * : * : * * * * * * * * * * * * * * * * * : . * : : * : * * *  |       |      |                                       |      |
| human      | 1154 | IHAFIESLPNKYSTKVGDKGTQLSGGQKQRIAIARALVRPHILLLDEATSALDTESEKV                          |       |      |                                       | 1213 |
| C. elegans | 1196 | IHNFAIELPEGFETRVDGRGTQLSGGQKQRIAIARALVRNPKILLLDEATSALDTESEKV                         |       |      |                                       | 1255 |
|            |      | ** * * . * * : . * : * * * : * * * * * * * * * * * * * * * * * * * * * * * * * * *   |       |      |                                       |      |
| human      | 1214 | VQEALDKAREGRTCIVIAHRLSTIQNADLIVVFQNGRVKEHGTHQQLLAQKGIYFSMVSV                         |       |      |                                       | 1273 |
| C. elegans | 1256 | VQEALDRAREGRTCIVIAHRLNTVMNADCIAVVSNGTIEKGTHTQLMSEKGAAYKLTQK                          |       |      |                                       | 1315 |
|            |      | * * * * * : * * * * * : * * * * * : * * * * * : * * * * * : * * * * * : * * * * *    |       |      |                                       |      |
| human      | 1274 | QAGTKRQ                                                                              | 1280  |      |                                       |      |
| C. elegans | 1316 | QMTEKK-                                                                              | 1321  |      |                                       |      |
|            |      | * * :                                                                                |       |      |                                       |      |

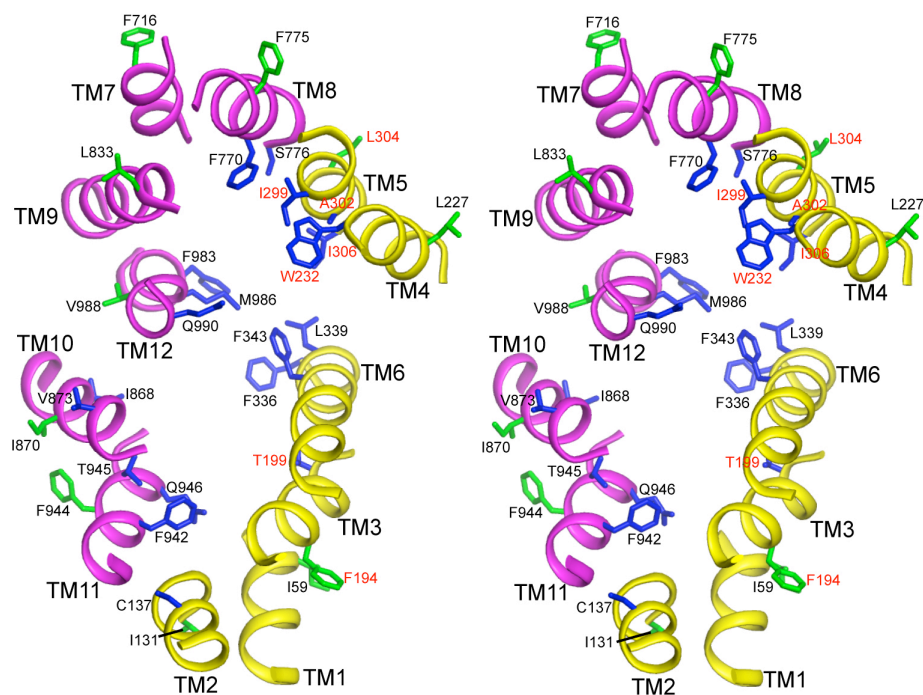

**Supplementary Figure 10. Mapping the introduced arginine residues on the modeled human P-gp structure.** Residues where arginine mutations enhanced P-gp maturation (shown as blue sticks) are presumed to line the drug-translocation pathway, whereas those inhibited maturation (shown as green sticks) are likely to face the lipids<sup>2</sup>. Residues in TMs 3, 4, and 5 incompatible with the mouse P-gp structure are labeled in red. This figure is modified from Figure 9 of Loo et al., *J Biol Chem.* **284**, 24074 (2009) except that we used our modeled human P-gp structure to interpret the arginine-scanning data.

**Supplementary Table 1. Data collection and refinement statistics**

|                                                     | Native                                        | SeMet                                         | Hg                                            |
|-----------------------------------------------------|-----------------------------------------------|-----------------------------------------------|-----------------------------------------------|
| <b>Data collection</b>                              |                                               |                                               |                                               |
| Space group                                         | P2 <sub>1</sub> 2 <sub>1</sub> 2 <sub>1</sub> | P2 <sub>1</sub> 2 <sub>1</sub> 2 <sub>1</sub> | P2 <sub>1</sub> 2 <sub>1</sub> 2 <sub>1</sub> |
| Cell dimensions                                     |                                               |                                               |                                               |
| <i>a</i> , <i>b</i> , <i>c</i> (Å)                  | 96.8, 155.3, 162.4                            | 95.9, 156.5, 162.0                            | 96.5, 155.8, 163.4                            |
| $\alpha$ , $\beta$ , $\gamma$ (°)                   | 90.0, 90.0, 90.0                              | 90.0, 90.0, 90.0                              | 90.0, 90.0, 90.0                              |
| Resolution (Å)                                      | 50.0 - 3.4                                    | 50.0 - 4.2                                    | 50.0 - 4.1                                    |
| <i>R</i> <sub>sym</sub>                             | 6.5                                           | 10.5                                          | 8.5                                           |
| <i>I</i> / $\sigma$ <i>I</i>                        | 32.4 (1.5)                                    | 24.6 (1.4)                                    | 31.7 (1.5)                                    |
| Completeness (%)                                    | 98.7 (95.5)                                   | 99.8 (99.9)                                   | 95.5 (91.0)                                   |
| Redundancy                                          | 8.2 (6.1)                                     | 11.5 (9.1)                                    | 12.0 (7.8)                                    |
| <b>Refinement</b>                                   |                                               |                                               |                                               |
| Resolution (Å)                                      | 50.0-3.4                                      |                                               |                                               |
| No. reflections                                     | 32319 / 1654                                  |                                               |                                               |
| <i>R</i> <sub>work</sub> / <i>R</i> <sub>free</sub> | 24.9 / 28.2                                   |                                               |                                               |
| No. atoms                                           |                                               |                                               |                                               |
| Protein                                             | 9628                                          |                                               |                                               |
| Carbohydrate                                        | 50                                            |                                               |                                               |
| Detergent                                           | 68                                            |                                               |                                               |
| B-factors                                           |                                               |                                               |                                               |
| Protein                                             | 144.0                                         |                                               |                                               |
| Carbohydrate                                        | 199.2                                         |                                               |                                               |
| Detergent                                           | 173.4                                         |                                               |                                               |
| R.m.s deviations                                    |                                               |                                               |                                               |
| Bond lengths (Å)                                    | 0.009                                         |                                               |                                               |
| Bond angles (°)                                     | 1.200                                         |                                               |                                               |
| Ramachandran plot (%)                               |                                               |                                               |                                               |
| Most favored                                        | 90.8                                          |                                               |                                               |
| Allowed                                             | 8.0                                           |                                               |                                               |
| Generously allowed                                  | 1.2                                           |                                               |                                               |
| Disallowed                                          | 0.0                                           |                                               |                                               |

\*Highest resolution shell is shown in parenthesis.

## References

- 1 Aller, S. G. *et al.* Structure of P-glycoprotein reveals a molecular basis for poly-specific drug binding. *Science (New York, N.Y)* **323**, 1718-1722 (2009).
- 2 Loo, T. W., Bartlett, M. C. & Clarke, D. M. Identification of residues in the drug translocation pathway of the human multidrug resistance P-glycoprotein by arginine mutagenesis. *The Journal of biological chemistry* **284**, 24074-24087, doi:10.1074/jbc.M109.023267 (2009).
